1        **Artificial neural networks to predict virological and immunological success in HIV**  
2        **patients under antiretroviral therapy from a nationwide cohort in Colombia, using the**  
3        **SISCAC database.**

4                                **Predicting HIV Success with Neural Networks in Colombia**

5        Alberto Buitrago-Gutierrez<sup>1</sup> , Alexandra Porras-Ramirez<sup>2</sup>

6

7                1. Physician, infectious disease specialist at Hospital San José and Clinica Sanitas,  
8                Bogota, Colombia. <https://orcid.org/0000-0003-2300-0540>

9                2. Group of Community Medicine and Public Health, Universidad El Bosque, Bogota,  
10                Colombia. <https://orcid.org/0000-0002-0800-1388>

11

12        \* AUTOR DE CORRESPONDENCIA:

13        Alexandra Porras-Ramirez

14        ORCID: 0000-0002-0800-1388

15        Address: Ak. 9 #131a-40, Usaquén, Bogotá, Cundinamarca. Postal Code: 110121

16        Mail: [rporrasalexandra@unbosque.edu.co](mailto:rporrasalexandra@unbosque.edu.co)

17

## 18 Abstract

19 **Objective:** This study aimed to develop predictive models both for viral suppression and  
20 immunological reconstitution using a standard set of reported variables in a nationwide  
21 database system (SISCAC) from a cohort of patients living with HIV in Colombia.

22 **Materials and Methods:** We included 2.182 patients with no missing data related to the  
23 outcomes of interest, during a 12 month follow up period. We randomly assigned a 0,7  
24 proportion of this cohort to de training dataset for 2 different predictive models (logistic  
25 regression, artificial neural networks). The AUC/ROC results were compared with those  
26 obtained through the construction of artificial neural networks with the specified parameters.

27 **Results:** From a cohort of 2182 patients, 85,79% were male and at HIV diagnosis, the mean  
28 value of the CD4 count was 342 x mm<sup>3</sup>. The logistic regression models obtained AUC/ROC  
29 accuracy for the outcomes “suppressed viral load” 0,7, “undetectable viral load” of 0,66 and  
30 “immunological reconstitution” 0,83; whereas the artificial neural network perceptron multilayer  
31 obtained AUC/ROC of 0,77, 0.69 and 0,87 for the same outcomes.

32 **Conclusions:** The selection of specific variables from a nationwide database in Colombia with  
33 quality control purposes allowed us to generate predictive models with an initial evaluation of  
34 performance regarding three predefined outcomes for virological and immunological success.

35 **Keywords:** HIV/AIDS, machine learning, logistic regression, artificial neural networks,  
36 dataset, prediction.

## 37 Introduction

38 Human immunodeficiency virus (HIV) infection and AIDS continue to generate a significant  
39 burden of morbidity and mortality worldwide, with developing countries contributing the most  
40 cases.

41 At a global level, the strategy of the Joint United Nations Program on HIV and AIDS (UNAIDS)  
42 was generated to direct and prioritize efforts to control the disease. Thus, for 2020, the goal  
43 of 90-90-90 was proposed, which refers to achieving a diagnosis of 90% of people living with

44 HIV, ensuring access to antiretroviral therapy for 90% of those diagnosed and achieving at  
45 least 90% of virologic suppression in those on treatment. Additionally, and more recently, that  
46 goal was revised to bring it to a goal of 95% in a horizon set until the year 2030 (1).

47 In Colombia exists a database in the high cost account (“Cuenta de alto costo”, in spanish),  
48 this institution has the task of monitoring high cost diseases under the regulations defined by  
49 the Ministry of Health and Social Protection of Colombia, it thereby reports the data generated  
50 by the different health insurers and providers of the country's social security system, including  
51 those referring to the care of people living with HIV (PLWH) in the country; latest results  
52 showing an increase in the number of annual cases from 35,000 in 2012 to 123,490 cases by  
53 2020 (1).

54 It is essential to introduce technological and computational tools in the clinical environment  
55 and with data obtained from our own population of patients evaluate classification and  
56 prediction models that can support the clinical approach; in our country the national SISCAC  
57 system can provide a robust database to build classification and prediction models that  
58 facilitate these clinical decisions and the creation of data driven algorithms and protocols.  
59 Proposals for the use of machine learning in health care are supported with several goals,  
60 such as enhancing the patient experience, optimizing population health, reducing costs, and  
61 improving the working conditions of health workers. (2–15)

62 Studies such as that of Robbins GK et al, through the collection of data from electronic medical  
63 record records in two tertiary care centers in Boston (United States); the Massachusetts  
64 General Hospital and the Brigham and Women's Hospital, evaluated through a multivariable  
65 logistic model which variables were associated with a greater risk of virological failure in  
66 patients who entered care of the HIV clinic within the first year from the start of care and  
67 treatment (10).

68 Wang D. et al. developed artificial neural network models to predict the response to therapy  
69 using data from resistance genotypes and clinical information, they compared the results  
70 obtained through the artificial neural network model with other methodologies such as random

71 forests and support vector machine algorithms. Using data from 1,204 episodes of treatment  
72 changes for antiretroviral therapy, obtained from the RDI (HIV Resistance Response Database  
73 Initiative) database, they sought to predict the behavior of viral load in the different models,  
74 observing a similar correlation between the RF and SVM models with the artificial neural  
75 network (17).

76 The results showed  $r^2$  correlations in the predicted viral load with the observed value that  
77 varied between 0.318-0.546 for the neural network, 0.590-0.751 for the random forests model  
78 and 0.300 to 0.720 for the support vector machine model. Subsequently, by combining the  
79 outputs of the 3 models, improvements were achieved in the correlations of the virological  
80 predictions obtained and those observed. The authors concluded that the introduced models  
81 (RF's and SVM) demonstrated similar performance to the neural network but that the  
82 correlation results could improve with their combined application. (17).

83 Neural networks use a structure of neurons or nodes to analyze the interactions between a  
84 group of covariates to predict an outcome; these neurons are organized by layers that are  
85 associated in an input layer, intermediate hidden layers, and an output layer. The weighted  
86 sum of neural inputs is somewhat analogous to the coefficients in linear and logistic  
87 regressions, and the connection weights are iteratively adjusted by the learning algorithm to  
88 minimize error and improve predictions (18). It is considered a strength for neural networks  
89 its ability to fit interactions between variables in non-linear associations without any prior user  
90 specification (11,19).

91 Our objective was to evaluate models for the prediction of virological and immunological  
92 success with three predefined outcomes; viral load category "suppressed" or viral load <200  
93 cop/mL, viral load category "undetectable" or viral load <20 cop/mL; and the immunological  
94 outcome considering a CD4 lymphocyte count at the end of the 12-month follow-up period  
95 above 350 cells x mm<sup>3</sup> as indicative of "immunological reconstitution". Using the clinical and  
96 laboratory variables obtained from the SISCAC registries for HIV/AIDS and with particular  
97 interest in evaluating the inclusion of an integrase inhibitor in the antiretroviral therapy. We

98 sought to determine which model offers better performance through a comparison of a  
99 multivariable logistic regression model and artificial neural networks.

## 100 **Materials and Methods**

101 This study pursued the training and validation of models using anonymous data from a cohort  
102 of patients from a specialized HIV care provider in Bogotá (Col), using the SISCAC database  
103 of the high-cost account. (<https://cuentadealtocosto.org/site/general/comunicado-siscac/>)  
104 (21–23).

105 The analysis included only data obtained from adult patients (18 years +) reported within the  
106 period of 12 months of follow-up between January 1<sup>st</sup> 2022 and January 1<sup>st</sup> 2023, the data  
107 was previously uploaded to the high-cost account following a structured set of 99 variables, of  
108 which the final analysis took 15, either in their primary registry or recoded to be included in the  
109 modelling.

110 This study was approved by the Ethics and Research committee of Vidamedical IPS on March  
111 17<sup>th</sup>, 2023. All methods followed national (Resolution 8430 of 1993, stated by the Colombian  
112 Health Ministry) and international (The Declaration of Helsinki) standards. It was a secondary  
113 data use, observational and retrospective study; therefore it did not require informed consent  
114 from participants.

## 115 **Variables and definitions**

116 The demographic variables from the SISCAC notification record included age, sex, weight and  
117 height, the diagnosis of pregnancy at the time of notification; the presence of comorbidities  
118 such as active tuberculosis, hepatitis B and C virus coinfection, chronic kidney disease,  
119 coronary disease and neoplasms not associated with AIDS.

120 Additionally, variables related to the characterization of HIV infection were taken, such as the  
121 years of diagnosis at the time of data notification, the mechanism of transmission of HIV  
122 infection, the stage at the time of diagnosis, the CD4 lymphocyte count and viral load at  
123 diagnosis and also at the time of initiation of antiretroviral therapy; also at the end of the 12-  
124 month follow-up period (January 2022 to January 2023). Changes in antiretroviral therapy, the

125 presence of treatment failures, the number of infectious disease specialty consultations within  
126 the 12-month follow-up (>3 or <3 visits in the 12-month period) were recorded; the months of  
127 effective dispensing of antiretroviral treatment, the presence of an integrase inhibitor  
128 (raltegravir, elvitegravir, dolutegravir) was recorded in the initial scheme and the final follow-  
129 up scheme for the 12-month period.

130 The variables were included in the models in a dichotomous way to facilitate their analysis.  
131 For example, the measurement of the months of dispensing therapy in the last year was  
132 categorized into patients with compliance greater than 95% and those below this goal,  
133 considering 100% dispensing in the total 12 months of the year, The variable on frequency of  
134 consultation by the infectious disease specialty was dichotomized according to the distribution  
135 found in the observations in >3 or <3 visits (21).

#### 136 **Data source**

137 The source of data were the records of the variables from the notification to the SISCAC  
138 database, and we included those considered relevant to the purpose of this investigation. The  
139 information is previously verified in accordance with the instructions for reporting information  
140 to the high-cost account for HIV/AIDS, regulated under Resolution 273 of 2019 of the Ministry  
141 of Health and Social Protection of Colombia (23) (Chrome-  
142 extension://efaidnbmnnibpcajpcgclefindmkaj/https://www.minsalud.gov.co/sites/rid/Lists/Bibli  
143 otecaDigital/RIDE/DE/DIJ/resolucion-273-de-2019.pdf) (23)

144 The data from ninety-nine variables corresponding to the administrative follow-up of the  
145 SISCAC was initially extracted (except cut-off date/Var.98 and serial code/Var.99) for a cohort  
146 of 6526 patients, belonging to an HIV service care provider in Colombia (Vidamedical IPS,  
147 <https://www.vidamedicalips.com/>). Patients included came from three cities (Bucaramanga,  
148 Cúcuta and Bogotá).

149 We discarded the records corresponding to patients under 18 years of age and the  
150 observations or patients that had missing data regarding the outcomes of interest at diagnosis,  
151 initiation of antiretroviral treatment, and at the end of follow-up (last 12 months between

152 January 2022 and January 2023). By filtering for lost data and recoding them, a total of fifteen  
153 variables were included in the definitive analysis (See figure No. 1 Patient selection flowchart).

#### 154 **Outcomes evaluated.**

155 We established three dependent variables or outcomes: suppressed viral load with a value  
156 <200 cop/ml, undetectable viral load with a value of <20 cop/ml and CD4 lymphocyte count  
157 >350 x mm<sup>3</sup>, all considered at the end of the twelve-month follow-up period. The CD4 count  
158 value was set arbitrarily by the investigators for the immunological reconstitution outcome,  
159 considering the mean value for the entire cohort in this parameter at the time of diagnosis.

#### 160 **Ethical aspects**

161 The study was performed through the secondary use of data previously collected in a  
162 periodically and regulated manner under resolution 273/2019 from the Ministry of Health and  
163 Social Protection of Colombia. (Chrome-  
164 extension://efaidnbnmnibpcajpcglclefindmkaj/https://www.minsalud.gov.co/sites/rid/Lists/Bibli  
165 otecaDigital/RIDE/DE/DIJ/resolucion-273-de-2019.pdf).

166 The study followed the recommendations for the secondary use of clinical data (24–26). The  
167 protocol was approved by the Vidamedical IPS research and ethics committee  
168 (<https://www.vidamedicalips.com/>). Data extraction was performed by computing personnel of  
169 the provider's data analysis area and delivered to the researchers in the excel program format  
170 (Microsoft® Excel®).

171 To preserve the anonymity of the patients and since it was a secondary analysis of data  
172 already collected for the purposes of notification to the high-cost account (CAC), each patient  
173 had a natural consecutive number assigned, discarding the identification numbers and names.

#### 174 **Statistical analysis**

175 We performed a bivariate analysis to obtain crude association measures in the training or  
176 retrospective cohort, obtaining the respective OR's (See tables 1, 2 and 3). The analysis then  
177 included the multivariate logistic regression model to adjust the variables for potential  
178 confusion and interaction, using the statistical program Stata Version 18.0 B. E, with the

179 construction of the respective AUC//ROC curves for each of the outcomes; calculating in the  
180 multivariate model the O.R's with the corresponding confidence intervals.

181 For the creation of the neural network, we used IBM SPSS Statistics Version 28.0.0.0  
182 program, which implements the "multilayer perceptron" network with a partition of 70% of the  
183 data in the training model and 30% in the testing; with a hyperbolic tangent hidden layer  
184 activation function and softmax output layer activation function (18)

185 In the construction of the artificial neural network we included ten factors given by the  
186 dichotomized predictive variables: age, sex, stage at diagnosis, start of antiretroviral therapy  
187 with any integrase inhibitor, coinfection with hepatitis B virus, coinfection with hepatitis C virus,  
188 active tuberculosis, changes in antiretroviral therapy, antiretroviral therapy failures,  
189 consultations by the I.D specialist >3 in the period of follow-up, chronic kidney disease,  
190 coronary disease, non-AIDS associated neoplasm and adherence to the antiretroviral therapy  
191 dispensing above 95%.

192 Additionally, as covariates we included viral load at the beginning of treatment and CD4  
193 lymphocyte count at the beginning of treatment plus the value of the body mass index (BMI)  
194 (18).

195 The distribution of the factors and the quantitative covariates was done to maintain the  
196 assumption of independence, using the multilayer perceptron network, as a supervised  
197 learning technique, with feedback architecture, hyperbolic tangent activation function in the  
198 hidden layers and softmax in the hidden layer output, plus cross entropy error function (18).

## 199 **Results**

200 From the 2182 patients included we identified a proportion of 85.79% for the male sex and  
201 14.21% for the female sex. Regarding age, we observed for the entire cohort a mean of 33  
202 years old (SD +/- 11.6 years), with an equal median, considering a normal distribution of this  
203 variable. For this cohort, the mean HIV diagnosis time was 3.3 years, with a minimum follow-  
204 up time from diagnosis of 3 months and a maximum of 18 years.



205 The reported mechanism of HIV transmission corresponded in 98.63% to sexual, with 1.37%  
206 grouping other different mechanisms and those not reported. At the time of diagnosis of HIV  
207 infection, the mean value of the CD4 lymphocyte count was 342 x mm<sup>3</sup>. The proportion of  
208 those coinfecting with hepatitis B at the start of treatment was only 1.51%, while hepatitis C  
209 coinfection was lower with 0.27%. The proportion of patients coinfecting with active  
210 tuberculosis was 1.15%.

211 During the initiation of antiretroviral therapy, the mean dispensing time of the antiretroviral  
212 therapy was 6.5 months (SD+/-4.45). The mean of therapy changes was 1.7 during de 12-  
213 month follow-up period, and the diagnosis of antiretroviral therapy failures was done on  
214 average 1.95 times with a minimum of one change and a maximum of three modifications in  
215 the antiretroviral therapy.

216 Regarding the outcome of “suppressed viral load” (<200 cop/ml), the following variables were  
217 observed as statistically significant: HIV stage at diagnosis (X<sup>2</sup> 4.507; p=0.105); hepatitis C  
218 virus infection at diagnosis (OR 0.188 95% CI 0.038-0.934; p=0.022); changes in antiretroviral  
219 therapy (OR 1.906 95% CI 1.409-2.577; p<0.001); adherence to antiretroviral therapy  
220 dispensing above 95% (OR 8.152 95%CI 4.63-14.33; p<0.001) and the record of >3 attentions  
221 for infectious diseases in the last year (OR 2.246 95%CI 1.68-2, 99; p<0.001) ( See table 1).

222 We used the bivariate and multivariate logistic regression analysis to generate the  
223 correspondent AUC/ROC curve for the outcome “suppressed viral load”, obtaining an area  
224 under de ROC curve of 0.7017.

225 When estimating the associations for the outcome variable “undetectable viral load” (<20  
226 cop/ml) it was found that the variables: HIV stage at diagnosis (X<sup>2</sup> 28.926; p<0.001); viral load  
227 at the start of ART >100,000 cop/ml (OR 0.637 95% CI 0.527-0.770; p<0.001); hepatitis C  
228 virus infection at diagnosis (OR 0.08 95% CI 0.009-0.687; p 0.003); changes in antiretroviral  
229 therapy during the follow-up period (O,R 1.586 95% CI 1.265-1.989; p<0.001); adherence to  
230 the dispensing of antiretroviral therapy above 95% (OR 2.618 IC95% 1.991-3.443; p<0.001)

231 and likewise the record of >3 attentions for the I.D specialist in the follow-up period (OR 1.648  
232 IC95% 1.277-2.128; p<0.001) were statistically significant (See table 2).

233 We evaluated the accuracy for the outcome of “undetectable viral load” for the multivariable  
234 logistic regression model, with the variables previously listed, obtaining an AUC/ROC of  
235 0,6605. (See figure 2).

236 Finally we obtained crude and adjusted O.R's for the outcome immunological reconstitution at  
237 the end of the follow-up period (CD4 count>350 x mm<sup>3</sup>).The variables HIV stage at diagnosis  
238 (X<sup>2</sup> 556.626; p<0.001); viral load at the start of antiretroviral therapy >100,000 cop/ml (OR  
239 0.582 95% CI 0.483-0.702; p<0.001); active tuberculosis at diagnosis (OR 0.288 95% CI  
240 0.129-0.645; p=0.001); the inclusion of an integrase inhibitor in the initial antiretroviral therapy  
241 (OR 0.601 95% CI 0.481-0.751; p<0.001); changes in antiretroviral therapy (OR 1.794 95%CI  
242 1.432-2.249; p<0.001); adherence to antiretroviral therapy dispensing above 95% (OR 1.534  
243 95% CI 1.208-1.946; p<0.001); the record of >3 consultations by the I.D specialist in the period  
244 of follow-up (OR 1.539 IC95% 1.194-1.984; p<0.001) met the criterion of significance. (See  
245 table No. 3).

246 The performance for immunological reconstitution of the multivariable logistic regression  
247 model obtained an AUC/ROC of 0,8364, showing better predictive accuracy than for the other  
248 previous outcomes (See figure 3).

249 For the artificial neural network, the model for the “suppressed viral load” outcome achieved  
250 an overall correct percentage in the training phase of 84.5% and in the tests of 84% (See  
251 figure 4). An AUC/ROC of 0.777 for this outcome. In this same model it showed 15.5% of  
252 incorrect forecasts in the training phase and 16% in the tests. The relationships of the neural  
253 network with its synaptic weighting can be observed in figure 4. Evaluating against its  
254 predictive capacity, this neural network showed an accuracy of 80.9% and a Kappa value of  
255 67.3%.

256 The accuracy of the neural network obtained through the AUC/ROC curve was 0.777 for this  
257 outcome.

258 In predicting the outcome of undetectable viral load, the neural network obtained an accuracy  
259 through the evaluation of AUC/ROC of 0.69, reflecting a similar performance when we  
260 compare it with the logistic regression model, and being consistently inferior for both models  
261 when compared with de suppressed viral load outcome. (See figure 5).

262 The best performance observed in the neural network models was observed for the outcome  
263 of immunological reconstitution, obtaining an AUC/ROC of 0.878, consistent with the same  
264 finding for the performance of the multivariable logistic regression models. (See figure 6).

265 When we compared the results of both modelling strategies for the three mentioned outcomes  
266 we see similar performances, favoring by a slight difference the neural network models and  
267 being consistent in better results for the prediction of immunological reconstitution in both  
268 cases. (See table 4).

## 269 **Discussion**

270 In this study we applied predictive models using the multivariable logistic regression and  
271 artificial neural networks for three predefined outcomes related to virological and  
272 immunological success in the treatment of people living with HIV (PLWH), the variables  
273 included those routinely collected through the SISCAC database in Colombia, including  
274 demographic information, clinical characteristics, and laboratory parameters. The SISCAC  
275 database purpose is to centralize the registration and validation in real time of quality and  
276 assistance indicators from patients of the high-cost account of the Colombian health system  
277 (<https://cuentadealcosto.org/general/comunicado-siscac/>).

278 We conducted a statistical analysis with a predictive intention, mainly referencing in the study  
279 by Wang et al, who developed machine learning algorithms through artificial neural networks,  
280 random forests, and support vector machines, to predict viral load results from 1204 episodes  
281 of change in antiretroviral therapy; incorporating genotype mutations input and treatment  
282 history variables (17).

283 Our population consisted of mainly men (86%), observing 75% of all below de 42 years of age,  
284 and with a fairly good level for CD4 lymphocyte count both at diagnosis and the initiation of  
285 antiretroviral therapy; suggesting earlier introductions of antiretroviral therapy for this cohort.  
286 We found previously known variables predictive of success such as the stage for HIV/AIDS at  
287 diagnosis, the presence of therapy failures during follow-up and the proportion of adherence  
288 to overall antiretroviral dispensation by the provider of care. No association was found both  
289 for the suppressed viral load and undetectable viral load outcomes regarding the initial therapy  
290 with the inclusion of an INSTI. An interesting finding was the association of more than three  
291 consultations with the I.D specialist during the follow-up period of twelve months with better  
292 results in all three outcomes.

293 A limitation already established neural networks is the necessity of a great amount of data for  
294 the training, as much as flexibility is required from the neural network bigger sets of data are  
295 needed.

296 The advantages of neural networks compared to other deep learning or machine learning  
297 techniques are:

- 298 • Non-linear system: By being able to process information in a non-linear way, it allows  
299 the processing of more “chaotic” data.
- 300 • Fault tolerance: Since it processes the information in parallel between the different  
301 nodes, neural networks are quite tolerant to single or multiple node failures.
- 302 • Adaptability: A neural network could adjust its parameters in real time depending on  
303 the inputs it receives and its characteristics, while other models do not have this  
304 adaptability.

305

306 Another weakness of neuronal networks is that once the layers increase, the interpretation of  
307 the model becomes more difficult, until it becomes a true black box. In addition, gradients that  
308 explode (that is, they grow without limit) or that vanish (that is, they progressively approach

309 zero), constitute aspects that make it difficult to train this architecture and reduce its ability to  
310 process long-duration sequences.

311 Although neural networks significantly reduce this inconvenience, they do not eliminate it  
312 and this problem becomes more evident as the sequence to process becomes increasingly  
313 extensive. The presence of exploding and fading gradients limits the long-term memory of  
314 these architectures.

315 Finally, regarding the results obtained with neural networks, the three models present  
316 acceptable results, with high precision and moderate Kappa values. The positive points of the  
317 networks neural networks is that they are very flexible and can work with very complex data  
318 to find patterns that other techniques cannot; and while in the other techniques you have more  
319 or less information about the patterns found in the data and how the variables affect the result,  
320 with neural networks this information is lost and you have only one input and one output.

321 Regarding the comparison of the models, we found similar performance both for the  
322 multivariable logistic regression and the neural networks, in both cases the accuracy was  
323 superior in predicting the immunological reconstitution outcome, and in this matter the  
324 inclusion of an INSTI for the initial antiretroviral therapy was statistically significant.

325 Also, we must consider the risk for selection bias, given that we obtained data from only one  
326 HIV care provider in the country, which can affect external validity, but as this institution  
327 allowed access to data from patients from three different cities in different circumstances of  
328 health insurance, access to care and socioeconomical conditions, the bias can be minimized.

### 329 **Conclusions**

330 This is an important exercise from already verified data uploaded to a nationwide database,  
331 allowing access to several variables from people living with HIV (PLWH) in Colombia; it allows  
332 an evolving process of integrating artificial intelligence algorithms to provide a growing  
333 framework directed to support health care providers with new tools towards their patients.

### 334 **Competing interests**

335 The authors of this manuscript declare they have no potential conflicts of interest with respect  
336 to the research, authorship, and/or publication of this article.

### 337 **Ethical responsibilities**

338 The authors manifest that this study followed the recommendations for the secondary use of  
339 clinical data (24–26). The protocol was reviewed and approved by the Vidamedical IPS  
340 research and ethics committee in the corresponding session of march 17<sup>th</sup>, 2023.

### 341 **Acknowledgements**

342 We thank Vidamedical IPS (<https://www.vidamedicalips.com/>) for supporting this study at its  
343 HIV Clinics in Colombia

### 344 **Funding**

345 This work was executed with funding from the investigators, personal computing equipment  
346 and statistical programs with individual licensing from them. No external nor sponsor funding  
347 was used.

348

### 349 **Data Availability Statement**

350 The data that support the findings of this study are available on request from the corresponding  
351 author. The data are not publicly available due to privacy or ethical restrictions.

### 352 **List of abbreviations**

353 AIDS: Acquired immune deficiency syndrome

354 ANN: Artificial neural network

355 ART: antiretroviral therapy

356 I.D: Infectious Diseases

357 INSTI: Integrase strand transfer inhibitors

358 PLWH: people living with HIV

359 S.D: Standard deviation

### 360 **References**

- 361 1. De C, Costo A. Situación del VIH/SIDA en Colombia 2020 CUENTA DE ALTO COSTO  
362 Fondo Colombiano de Enfermedades de Alto Costo.  
363 [https://cuentadealtocosto.org/vih/situacion-del-vih-2020-v\\_0-1/](https://cuentadealtocosto.org/vih/situacion-del-vih-2020-v_0-1/)
- 364 2. Bodenheimer T, Sinsky C. From triple to Quadruple Aim: Care of the patient requires care  
365 of the provider. *Ann Fam Med*. 2014 Nov 1;12(6):573–6. doi: 10.1370/afm.1713.
- 366 3. Lin J, Mauntel-Medici C, Heinert S, Baghikar S. Harnessing the power of the electronic  
367 medical record to facilitate an opt-out HIV screening program in an urban academic  
368 Emergency Department. *Journal of Public Health Management and Practice*. 2017;23(3):264–  
369 8. doi: 10.1097/PHH.0000000000000448.
- 370 4. Roth JA, Radevski G, Marzolini C, Rauch A, Günthard HF, Kouyos RD, et al. Cohort-Derived  
371 Machine Learning Models for Individual Prediction of Chronic Kidney Disease in People Living  
372 with Human Immunodeficiency Virus: A Prospective Multicenter Cohort Study. *Journal of*  
373 *Infectious Diseases*. 2021 Oct 1;224(7):1198–208. doi: 10.1093/infdis/jiaa236.
- 374 5. Oliveira A, Faria BM, Gaio AR, Reis LP. Data Mining in HIV-AIDS Surveillance System:  
375 Application to Portuguese Data. *J Med Syst*. 2017 Apr 1;41(4). doi: 10.1007/s10916-017-  
376 0697-4.
- 377 6. Kamal S, Urata J, Cavassini M, Liu H, Kouyos R, Bugnon O, et al. Random Forest machine  
378 learning algorithm predicts virologic outcomes among HIV infected adults in Lausanne,  
379 Switzerland using electronically monitored combined antiretroviral treatment adherence. *AIDS*  
380 *Care - Psychological and Socio-Medical Aspects of AIDS/HIV*. 2021;33(4):530–6. doi:  
381 10.1080/09540121.2020.1751045.
- 382 7. Xiang Y, Du J, Fujimoto K, Li F, Schneider J, Tao C. Application of artificial intelligence and  
383 machine learning for HIV prevention interventions. Vol. 9, *The Lancet HIV*. Elsevier Ltd; 2022.  
384 p. e54–62. doi: 10.1016/S2352-3018(21)00247-2.
- 385 8. Alehegn M. Application of machine learning and deep learning for the prediction of  
386 HIV/AIDS. *HIV and AIDS Review*. 2022;21(1):17–23. [doi.org/10.3389/fpubh.2022.967681](https://doi.org/10.3389/fpubh.2022.967681).

- 387 9. Benitez AE, Musinguzi N, Bangsberg DR, Bwana MB, Muzoora C, Hunt PW, et al. Super  
388 learner analysis of real-time electronically monitored adherence to antiretroviral therapy under  
389 constrained optimization and comparison to non-differentiated care approaches for persons  
390 living with HIV in rural Uganda. 2020; Available from:  
391 <http://onlinelibrary.wiley.com/doi/10.1002/jia2.25467/full>
- 392 10. Robbins GK, Johnson KL, Chang Y, Jackson KE, Sax PE, Meigs JB, et al. Predicting  
393 virologic failure in an HIV clinic. *Clinical Infectious Diseases*. 2010 Mar 1;50(5):779–86. doi:  
394 10.1086/650537.
- 395 11. Bi Q, Goodman KE, Kaminsky J, Lessler J. What is machine learning? A primer for the  
396 epidemiologist. *Am J Epidemiol*. 2019 Dec 31;188(12):2222–39. doi: 10.1093/aje/kwz189.
- 397 12. Peiffer-Smadja N, Rawson TM, Ahmad R, Buchard A, Pantelis G, Lescure FX, et al.  
398 Machine learning for clinical decision support in infectious diseases: a narrative review of  
399 current applications. Vol. 26, *Clinical Microbiology and Infection*. Elsevier B.V.; 2020. p. 584–  
400 95. doi: 10.1016/j.cmi.2019.09.009.
- 401 13. Hinton G. Deep learning-a technology with the potential to transform health care. Vol. 320,  
402 *JAMA - Journal of the American Medical Association*. American Medical Association; 2018. p.  
403 1101–2. doi: 10.1001/jama.2018.11100.
- 404 14. Ridgway JP, Lee A, Devlin S, Kerman J, Mayampurath A. Machine Learning and Clinical  
405 Informatics for Improving HIV Care Continuum Outcomes. Vol. 18, *Current HIV/AIDS Reports*.  
406 Springer; 2021. p. 229–36. doi: 10.1007/s11904-021-00552-3.
- 407 15. Yang X, Zhang J, Chen S, Weissman S, Olatosi B, Li X. Utilizing electronic health record  
408 data to understand comorbidity burden among people living with HIV: a machine learning  
409 approach. *AIDS*. 2021 May 1;35:S39–51. doi: 10.1097/QAD.0000000000002736.
- 410 16. Gebrezgi MT, Fennie KP, Sheehan DM, Ibrahimou B, Jones SG, Brock P, et al.  
411 Development and Validation of a Risk Prediction Tool to Identify People with HIV Infection  
412 Likely Not to Achieve Viral Suppression. *AIDS Patient Care STDS*. 2020 Apr 1;34(4):157–65.  
413 doi: [10.1089/apc.2019.0224](https://doi.org/10.1089/apc.2019.0224).



- 414 17. Wang D, Larder B, Revell A, Montaner J, Harrigan R, De Wolf F, et al. A comparison of  
415 three computational modelling methods for the prediction of virological response to  
416 combination HIV therapy. *Artif Intell Med.* 2009 Sep;47(1):63–74. doi:  
417 10.1016/j.artmed.2009.05.002.
- 418 18. IBM SPSS Neural Networks New tools for building predictive models [Internet]. Available  
419 from: [www.ibm.com/spss/devcentral](http://www.ibm.com/spss/devcentral).
- 420 19. Sardari S, Sardari D. Applications of Artificial Neural Network in AIDS Research and  
421 Therapy. Vol. 8, *Current Pharmaceutical Design*. 2002. doi: 10.2174/1381612024607199.
- 422 20. Pedrero V, Reynaldos-Grandon K, Ureta-Achurra J, Cortez-Pinto E. Generalidades del  
423 Machine Learning y su aplicación en la gestión sanitaria en servicios de urgencia. *Rev Med*  
424 *Chile* 2021; 149:248-54. <http://dx.doi.org/10.4067/s0034-98872021000200248>.
- 425 21. Consenso basado en Evidencia. Indicadores Mínimos para Evaluar Resultados de Gestión  
426 y Clínicos en Instituciones de Atención a Personas Viviendo con VIH en Colombia. Cuenta de  
427 Alto Costo. Fondo Colombiano de Enfermedades de Alto Costo. Junio-diciembre de 2014.  
428 [https://cuentadealtocosto.org/publicaciones/indicadores-minimos-para-evaluar-resultados-](https://cuentadealtocosto.org/publicaciones/indicadores-minimos-para-evaluar-resultados-de-gestion-y-clinicos-en-instituciones-de-atencion-a-personas-viviendo-con-vih-en-colombia/)  
429 [de-gestion-y-clinicos-en-instituciones-de-atencion-a-personas-viviendo-con-vih-en-colombia/](https://cuentadealtocosto.org/publicaciones/indicadores-minimos-para-evaluar-resultados-de-gestion-y-clinicos-en-instituciones-de-atencion-a-personas-viviendo-con-vih-en-colombia/)
- 430 22. De C, Costo A. Situación del VIH/SIDA en Colombia 2021 CUENTA DE ALTO COSTO.  
431 *Fondo Colombiano de Enfermedades de Alto Costo, Cuenta de Alto*  
432 *Costo (CAC). Situación del VIH/SIDA en Colombia 2020*; Bogotá D.C. 2021.
- 433 23. Instructivo para el reporte de información según resolución 273 del 2019. Cuenta de Alto  
434 Costo. Ministerio de Salud y Protección Social. República de Colombia. Version 02. 2021.  
435 [chrome-extension://efaidnbmninnibpcajpcgclclefindmkaj/https://www.cajacopieps.com/wp-](chrome-extension://efaidnbmninnibpcajpcgclclefindmkaj/https://www.cajacopieps.com/wp-content/uploads/Instructivo_Reporte_VIH_2022.pdf)  
436 [content/uploads/Instructivo\\_Reporte\\_VIH\\_2022.pdf](chrome-extension://efaidnbmninnibpcajpcgclclefindmkaj/https://www.cajacopieps.com/wp-content/uploads/Instructivo_Reporte_VIH_2022.pdf)
- 437 24. Jungkunz M, Köngeter A, Mehlis K, Winkler EC, Schickhardt C. Secondary use of clinical  
438 data in data-gathering, non-interventional research or learning activities: Definition, types, and  
439 a framework for risk assessment. *J Med Internet Res.* 2021 Jun 1;23(6). doi: [10.2196/26631](https://doi.org/10.2196/26631).

- 440 25. Wiesenauer M, Johner C, Röhrig R. Secondary use of clinical data in healthcare providers  
441 - An overview on research, regulatory and ethical requirements. In: Studies in Health  
442 Technology and Informatics. IOS Press; 2012. p. 614–8. PMID: 22874264
- 443 26. Cumyn A, Dault R, Barton A, Cloutier AM, Ethier JF. Citizens, Research Ethics Committee  
444 Members and Researchers' Attitude Toward Information and Consent for the Secondary Use  
445 of Health Data: Implications for Research Within Learning Health Systems. Journal of  
446 Empirical Research on Human Research Ethics. 2021 Jul 1;16(3):165–78. doi:  
447 10.1177/1556264621992214

**Table 1. Bivariate and multivariate regression analysis for the outcome "suppressed viral load."**

| Variables                                                  | Crude OR† 95%CI‡  | X <sup>2</sup> p-value | Adjusted OR 95%CI            | P value |
|------------------------------------------------------------|-------------------|------------------------|------------------------------|---------|
| Age                                                        | 1,462 1,160-1,842 | 10,442 p=0,001         | 1,394 1,078-1,801            | p=0,01  |
| Sex                                                        | 0,833 0,629-1,239 | 0,520 p=0,471          | 1,144 0,795-1,646            | p=0,467 |
| Female                                                     | 0,898 0,669-1,205 | -                      |                              |         |
| Male                                                       | 0,883 0,629-1,239 | -                      |                              |         |
| Viral load at the start of ART§ (>o<100.000 cop/ml)        | 1,007 0,794-1,278 | 0,004 p=0,952          | 1,077 0,829-1,400            | p=0,574 |
| HIV stage at diagnosis                                     |                   | 4,507 p 0,105          | Stage 2<br>0,805 0,582-1,111 | p=0,188 |
|                                                            |                   |                        | Stage 3<br>0,592 0,415-0,845 | p=0,004 |
| HBV infection                                              | 0,076 0,005-0,664 | 0,014 p=0,905          | 1,236 0,450-3,390            | p=0,680 |
| HCV infection                                              | 0,188 0,038-0,934 | 5,230 p 0,022          | 0,149 0,024-0,915            | p=0,04  |
| Active tuberculosis at diagnosis                           | 0,754 0,281-2,022 | 0,317 p 0,573          | - -                          | -       |
| ART antiretroviral therapy with INSTI's¶ included          | 0,920 0,689-1,227 | 0,324 p 0,569          | 1,360 1,004-1,842            | p=0,04  |
| ART Changes                                                | 1,906 1,409-2,577 | 17,976 p <0,001        | 2,150 1,513-3,055            | p<0,001 |
| Adherence due to ART dispensing (>95%/11 months)           | 8,152 4,63-14,33  | 73,156 p<0,001         | 8,23 4,629-14,656            | p<0,001 |
| Failure with current ART                                   | 0,931 0,546-1,589 | 0,068 p 0,794          | 0,241 0,241-0,843            | p=0,013 |
| Chronic kidney disease                                     | 0,841 0,825-0,856 | 0,948 p 0,330          | - -                          | -       |
| Coronary heart disease                                     | 0,841 0,825-0,856 | 0,758 p 0,384          | - -                          | -       |
| Neoplasm not associated with AIDS                          | 0,841 0,825-0,825 | 1,138 p 0,286          | - -                          | -       |
| Consultations with I.D specialist in the period (>3 vs <3) | 2,246 1,68-2,99   | 31,687 p <0,001        | 2,098 1,554-2,830            | p<0,001 |

medRxiv preprint doi: <https://doi.org/10.1101/2024.10.26.24316181>; this version posted October 28, 2024. The copyright holder for this preprint (which was not certified by peer review) is the author/funder, who has granted medRxiv a license to display the preprint in perpetuity. It is made available under a [CC-BY 4.0 International license](https://creativecommons.org/licenses/by/4.0/).

†: Odds Ratio  
 ‡ Confidence interval  
 §: Antiretroviral therapy  
 ¶: Integrase strand transfer inhibitor

**Table 2. Bivariate and multivariate regression analysis for the outcome "undetectable viral load"**

| Variables                                           | Crude OR† 95%CI   | X <sup>2</sup> p-value | Adjusted OR 95%CI           | P value |
|-----------------------------------------------------|-------------------|------------------------|-----------------------------|---------|
| Age                                                 | 1,182 0,982-1,423 | 3,131 p=0,077          | 1,226 0,997-1,506           | p=0,05  |
| Sex                                                 | 0,999 0,766-1,302 | 0,000 p=0,991          | 1,191 0,896-1,583           | p=0,226 |
| Female                                              | 0,999 0,795-1,254 | -                      |                             |         |
| Male                                                | 1,000 0,963-1,039 | -                      |                             |         |
| Viral load at the start of ART§ (>o<100.000 cop/ml) | 0,637 0,527-0,770 | 21,948 p<0,001         | 0,708 0,575-0,871           | p=0,001 |
| HIV stage at diagnosis                              |                   | 28,926 p<0,001         | Stage2<br>0,783 0,602-1,019 | p=0,06  |
|                                                     |                   |                        | Stage3<br>0,520 0,391-0,693 | p<0,001 |
| HBV infection                                       | 1,076 0,498-2,329 | 0,035 p=0,852          | 1,186 0,524-2,686           | p=0,681 |
| HCV infection                                       | 0,080 0,009-0,687 | 8,758 p=0,003          | 0,760 0,008-0,676           | p=0,021 |
| Active tuberculosis at diagnosis                    | 0,601 0,269-1,345 | 1,567 p=0,211          | - -                         | -       |
| ART antiretroviral therapy with INSTI's¶ included   | 0,851 0,675-1,075 | 1,835 p=0,176          | 1,154 0,901-1,477           | p=0,256 |
| ART Changes                                         | 1,586 1,265-1,989 | 16,164 p<0,001         | 1,783 1,373-2,316           | p<0,001 |

|                                                             |       |              |                |       |             |         |
|-------------------------------------------------------------|-------|--------------|----------------|-------|-------------|---------|
| Adherence due to ART dispensing (>95%/11 months)            | 2,618 | 1,991-3,443  | 50,036 p<0,001 | 2,854 | 2,135-3,815 | p<0,001 |
| Failure with current ART                                    | 0,750 | 0,492-1,142  | 1,811 p=0,178  | 0,475 | 0,293-0,769 | p=0,002 |
| chronic kidney disease                                      | 1,614 | 0,180-14,473 | 0,187 p=0,666  | -     | -           | -       |
| Coronary heart disease                                      | 0,712 | 0,693-0,731  | 1,616 p=0,204  | -     | -           | -       |
| Neoplasm not associated with AIDS                           | 0,712 | 0,693-0,731  | 2,426 p=0,119  | -     | -           | -       |
| Consultations with I.D specialist in the period (>3 vs <3)) | 1,648 | 1,277-2,128  | 14,904 p<0,001 | 1,505 | 1,154-1,965 | p=0,003 |

†: Odds Ratio  
‡ Confidence interval  
§: Antiretroviral therapy  
¶ Integrase strand transfer inhibitor

**Table 3. Bivariate and multivariate regression analysis for the outcome "immunological reconstitution"**

medRxiv preprint doi: <https://doi.org/10.1101/2024.10.26.24316181>; this version posted October 28, 2024. The copyright holder for this preprint (which was not certified by peer review) is the author/funder, who has granted medRxiv a license to display the preprint in perpetuity.

| Variables                                                   | Crude OR† 95%CI    | X2 p-value      | Adjusted OR 95%CI                          | p value            |
|-------------------------------------------------------------|--------------------|-----------------|--------------------------------------------|--------------------|
| Age                                                         | 0,634 0,527-0,762  | 23,605 p<0,001  | 0,986 0,778-1,250                          | p=0,912            |
| Sex                                                         | 1,238 0,960-1,596  | 2,718 p=0,099   | 1,181 0,863-1,617                          | p=0,297            |
| Female                                                      | 1,200 0,967-1,489  |                 |                                            |                    |
| Male                                                        | 0,969 0,932-1,007  |                 |                                            |                    |
| Viral load at the start of ART‡ (>0<100.000 cop/ml)         | 0,582 0,483-0,702  | 32,678 p<0,001  | 1,402 1,107-1,776                          | p=0,005            |
| HIV Stage at diagnosis                                      |                    | 556,626 p<0,001 | Stage 2 0,078 0,005-0,019<br>Stage 3 0,010 | p<0,001<br>p<0,001 |
| HBV infection                                               | 1,174 0,543-2,540  | 0,167 p=0,683   | 0,935 0,360-2,428                          | p=0,891            |
| HCV infection                                               | 0,438 0,088-2,177  | 1,076 p=0,300   | 0,200 0,025-1,547                          | p=0,123            |
| Active tuberculosis at diagnosis                            | 0,288 0,129-0,645  | 10,362 p=0,001  | -                                          | -                  |
| ART antiretroviral therapy with INSTI's¶ included           | 0,601 0,481-0,751  | 20,298 p<0,001  | 0,661 0,498-0,877                          | p=0,004            |
| ART Changes                                                 | 1,794 1,432-2,249  | 26,203 p<0,001  | 2,594 1,927-3,492                          | p<0,001            |
| Adherence due to ART dispensing (>95%/11 months)            | 1,534 1,208-1,946  | 12,484 p<0,001  | 2,123 1,586-2,843                          | p<0,001            |
| Failure with current ART                                    | 0,749 0,495-1,135  | 1,865 p=0,172   | 0,471 0,277-0,801                          | p=0,005            |
| Chronic kidney disease                                      | 0,694 0,675-0,714  | 2,202 p=0,138   | -                                          | -                  |
| Coronary heart disease                                      | 0,439 0,062-3,120  | 0,717 p=0,397   | -                                          | -                  |
| Neoplasm not associated with AIDS                           | 2,201 0,257-18,872 | 0,545 p=0,460   | -                                          | -                  |
| Consultations with I.D specialist in the period (>3 vs <3)) | 1,539 1,194-1,984  | 11,203 p<0,001  | 1,392 1,017-1,905                          | p=0,038            |

†: Odds Ratio  
‡ Confidence interval  
§: Antiretroviral therapy  
¶ Integrase strand transfer inhibitor

**Table 4. AUC/ROC Comparison Logistic regression models vs multilayer perceptron neural networks**

| Predictive models                | AUC/ROC |
|----------------------------------|---------|
| Multivariate logistic regression |         |
| Suppressed viral load            | 0,70    |
| Undetectable viral load          | 0,66    |
| Immunological reconstitution     | 0,83    |

| Multilayer Neural Network/Perceptron |      |
|--------------------------------------|------|
| Suppressed viral load                | 0,77 |
| Undetectable viral load              | 0,69 |
| Immunological reconstitution         | 0,87 |

**Figure 1. Population selection flowchart**

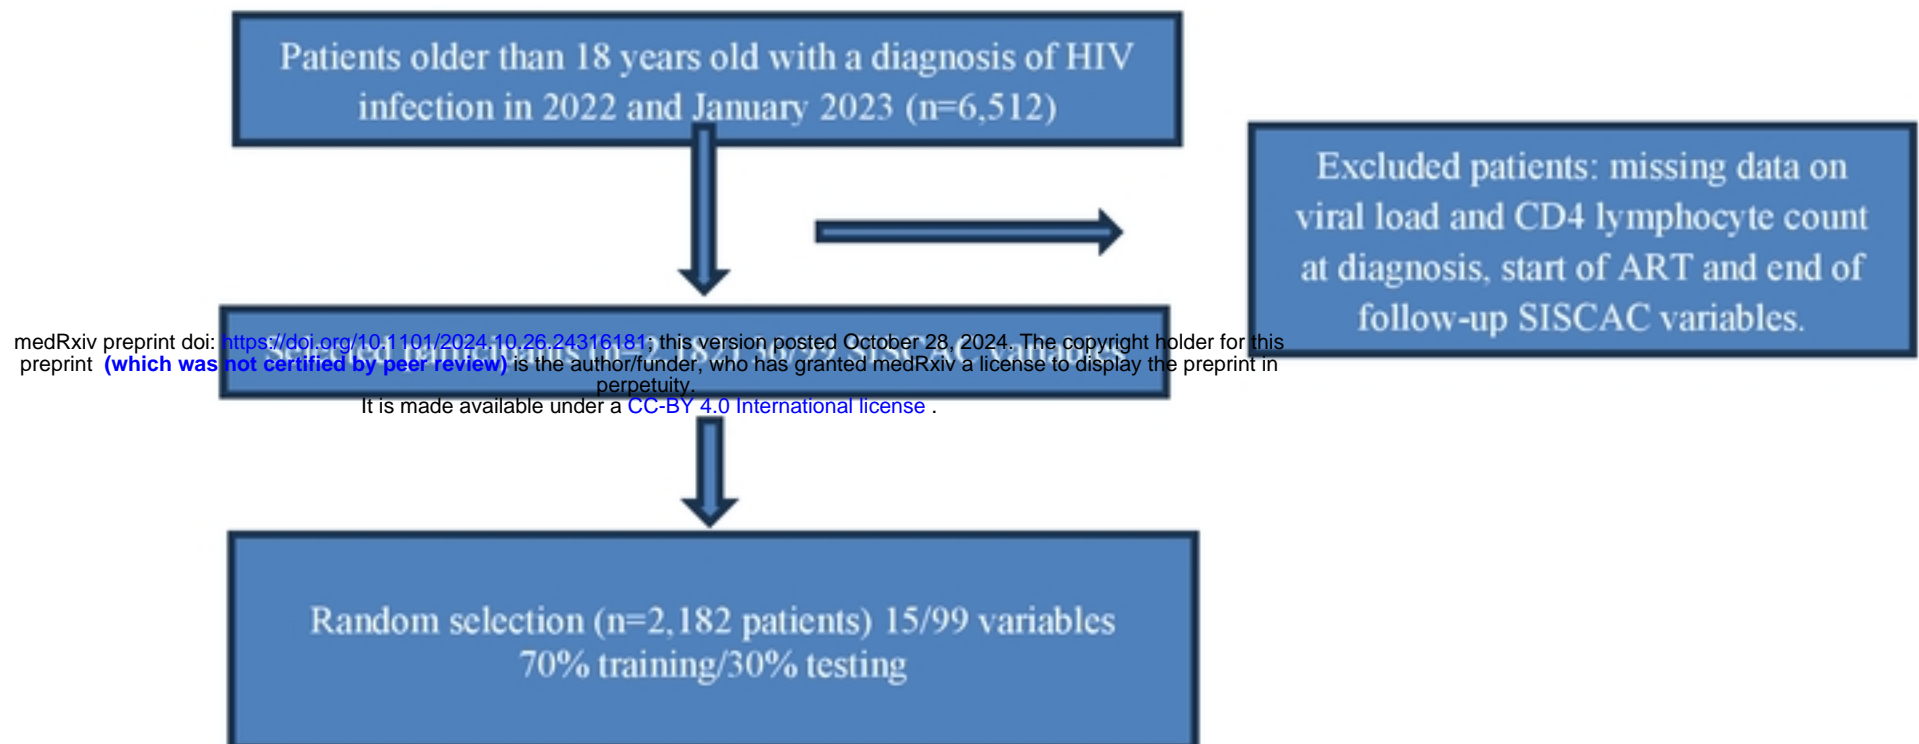

**Figure 2. AUC/ROC for “undetectable viral load” multivariable logistic regression**

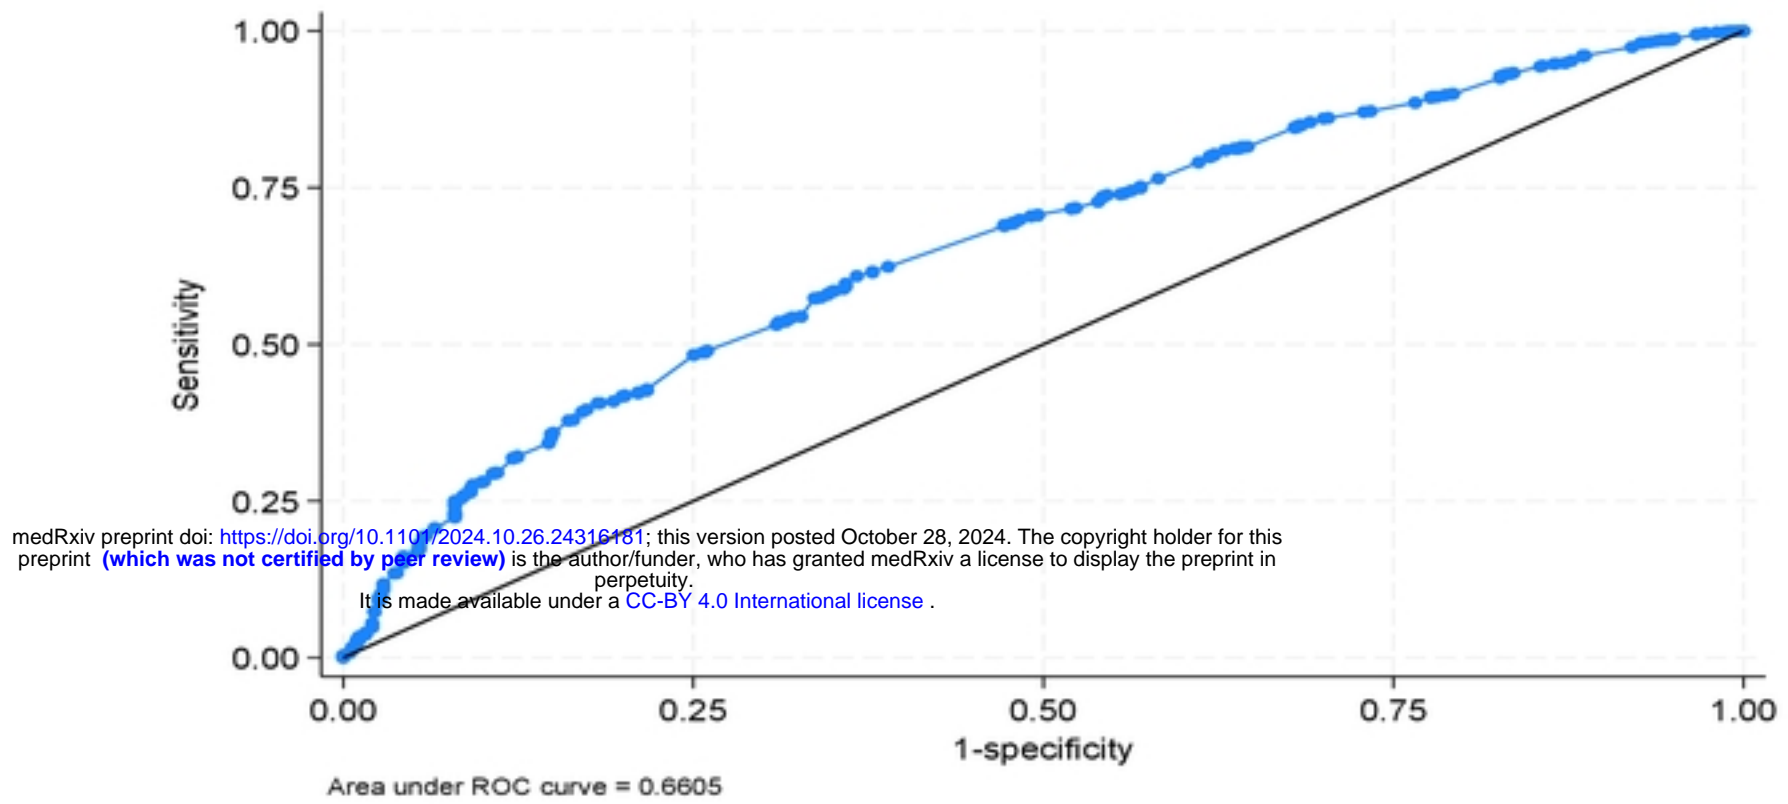

**Figure 3. AUC/ROC for “immunological reconstitution” multivariable logistic regression**

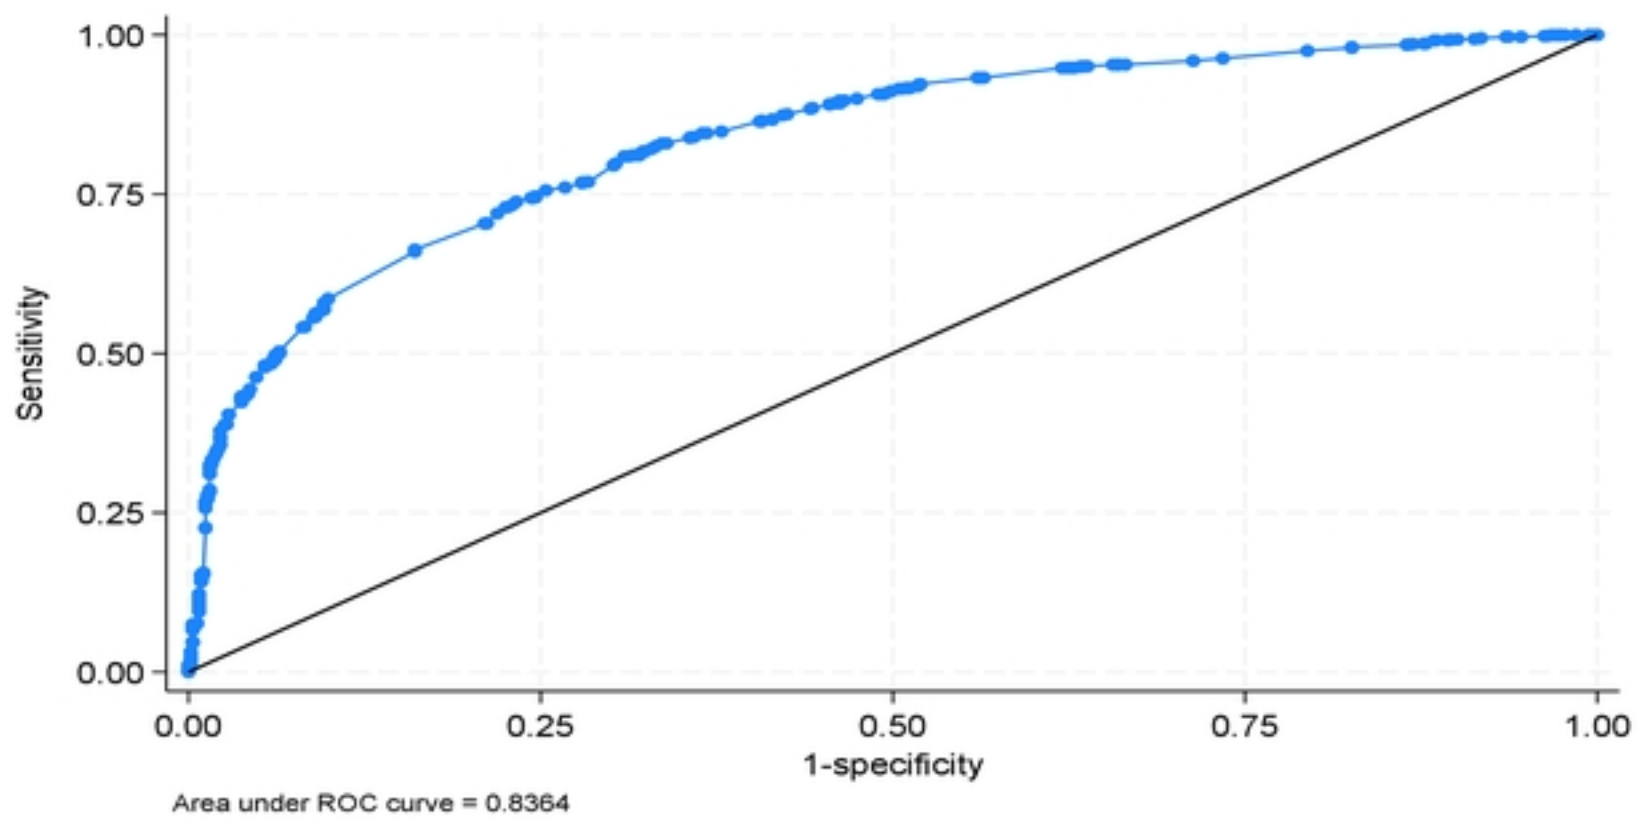

Figure 4. Artificial neural network for suppressed viral load.

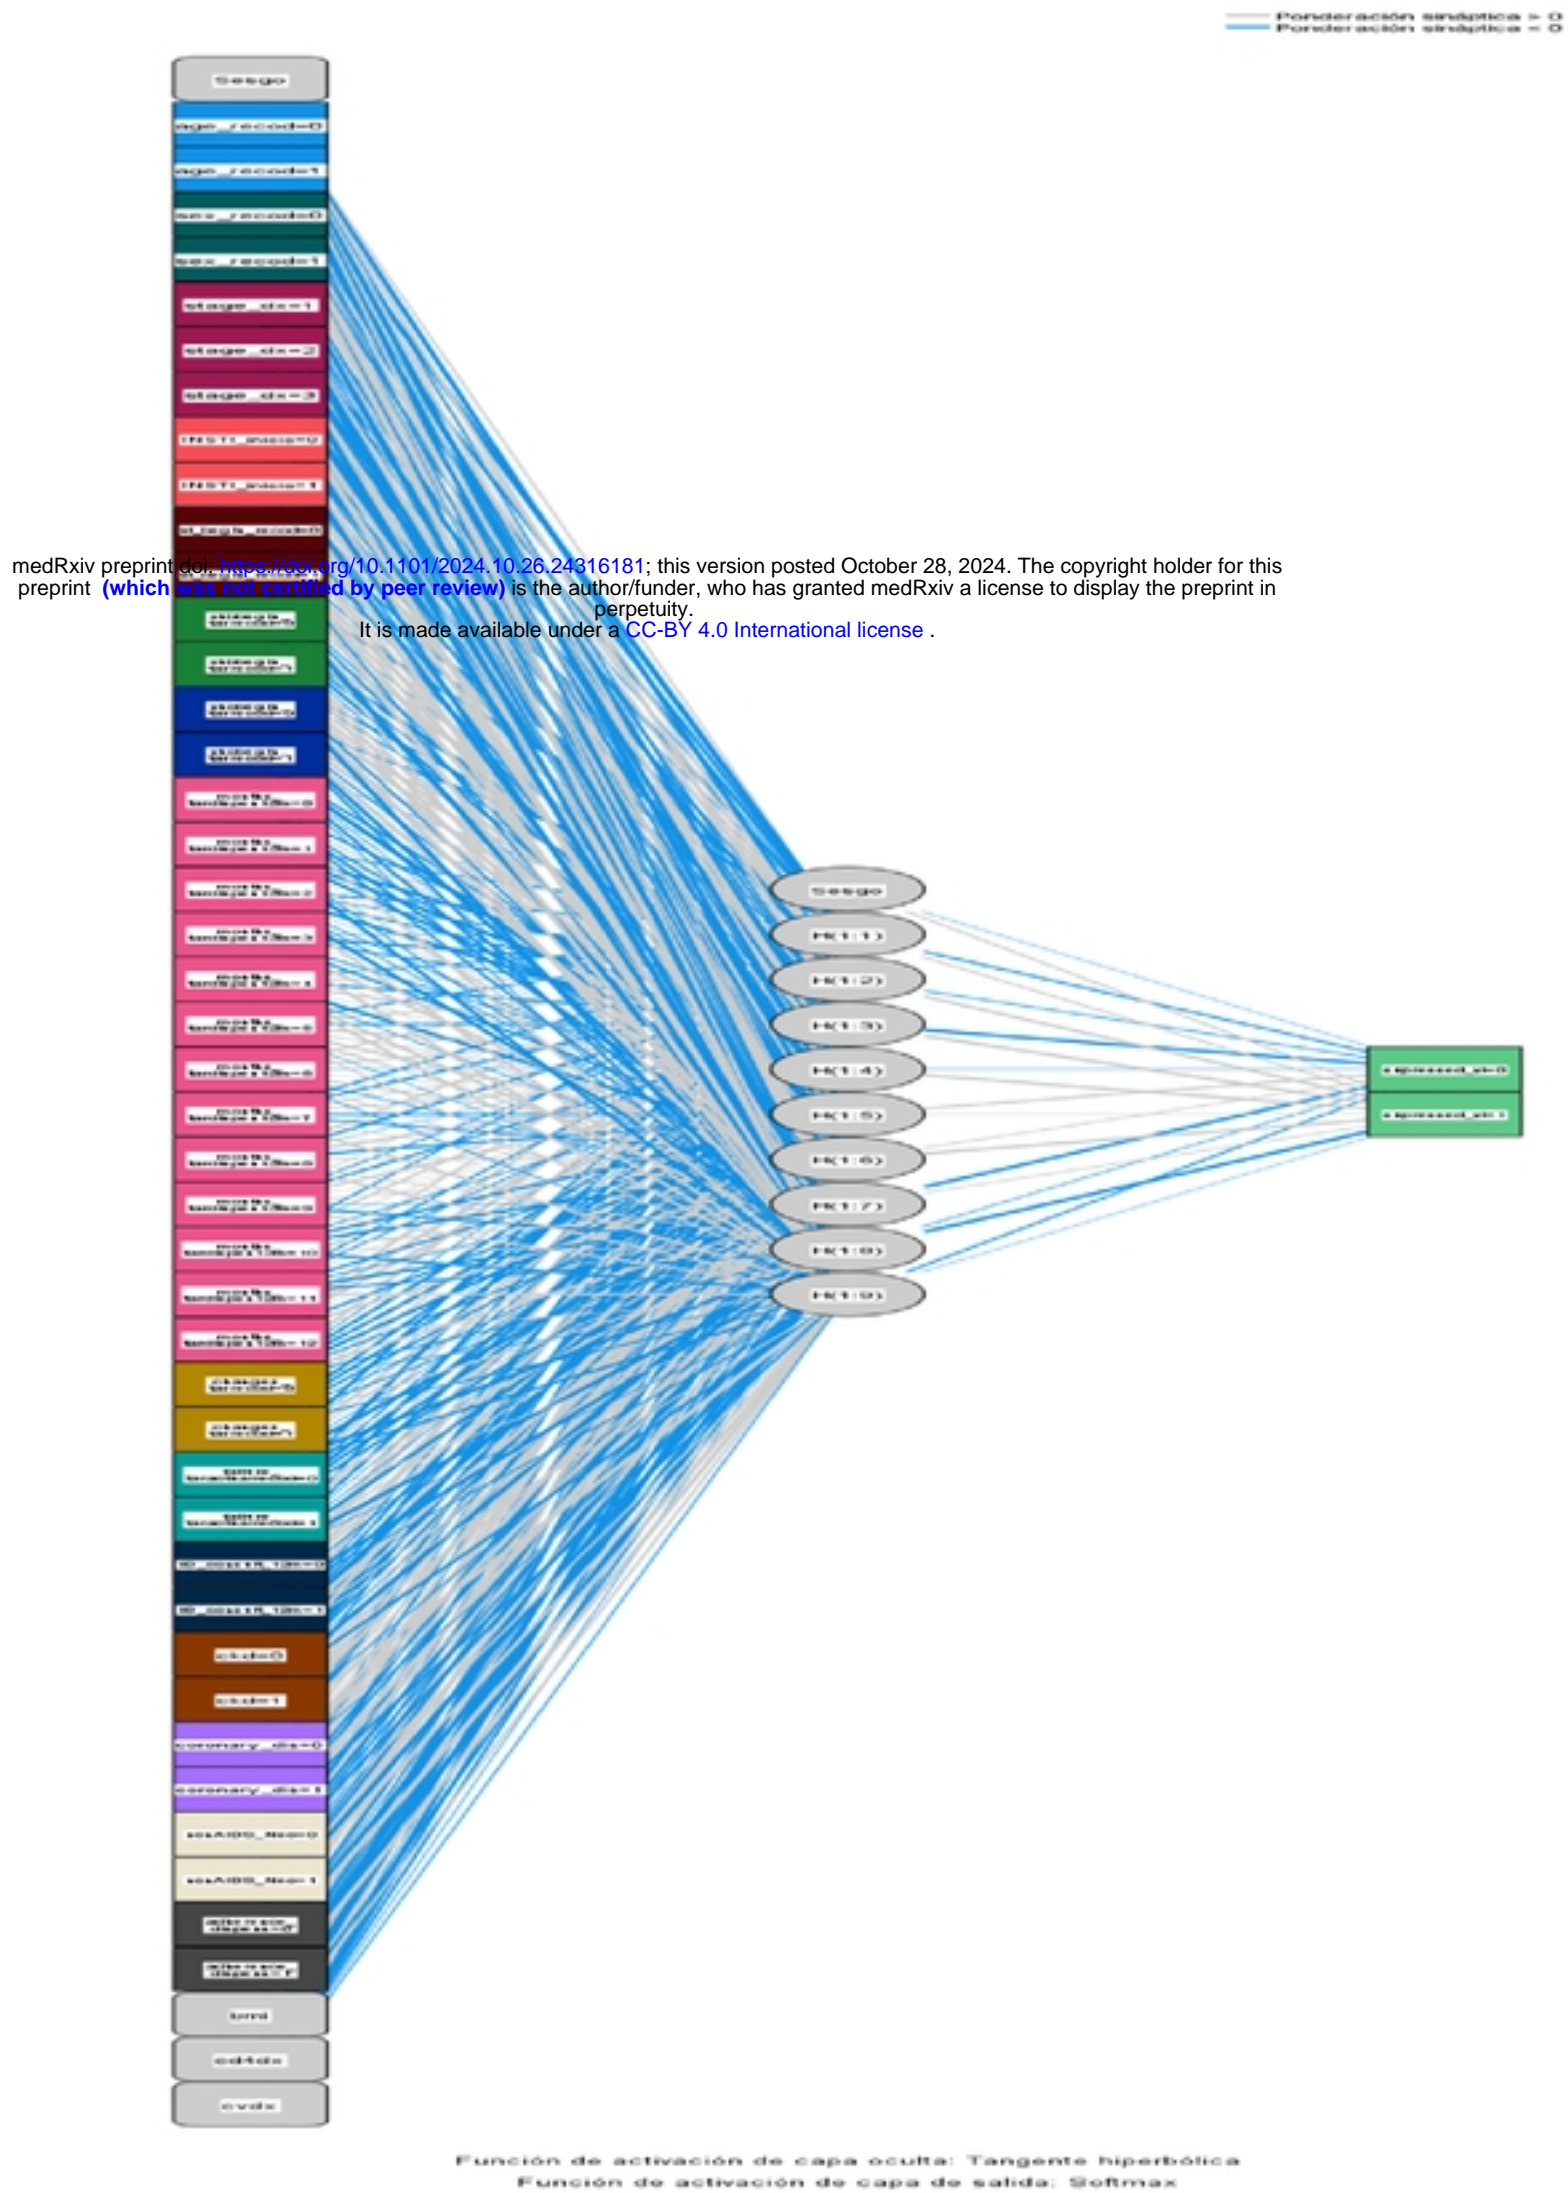

Figure 5. AUC/ROC curve for “undetectable viral load” ANN

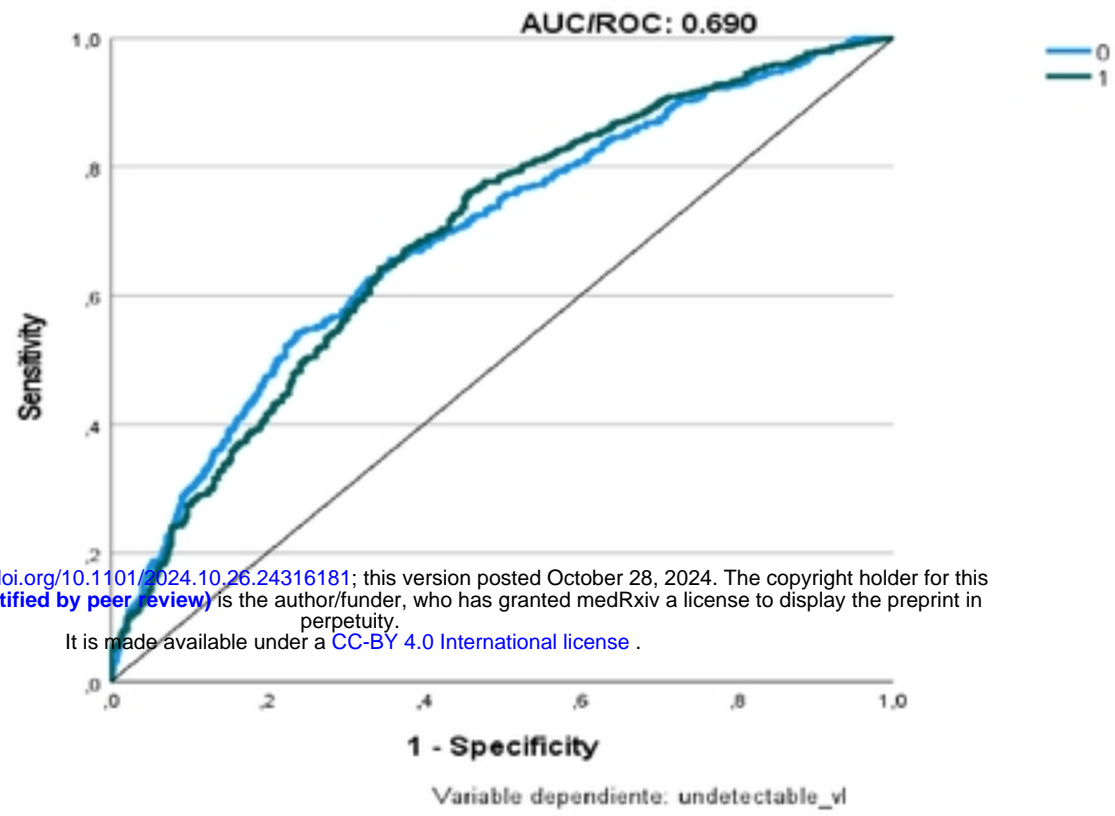

medRxiv preprint doi: <https://doi.org/10.1101/2024.10.26.24316181>; this version posted October 28, 2024. The copyright holder for this preprint (which was not certified by peer review) is the author/funder, who has granted medRxiv a license to display the preprint in perpetuity. It is made available under a [CC-BY 4.0 International license](https://creativecommons.org/licenses/by/4.0/).

Figure 6. AUC/ROC curve for “immunological reconstitution” ANN

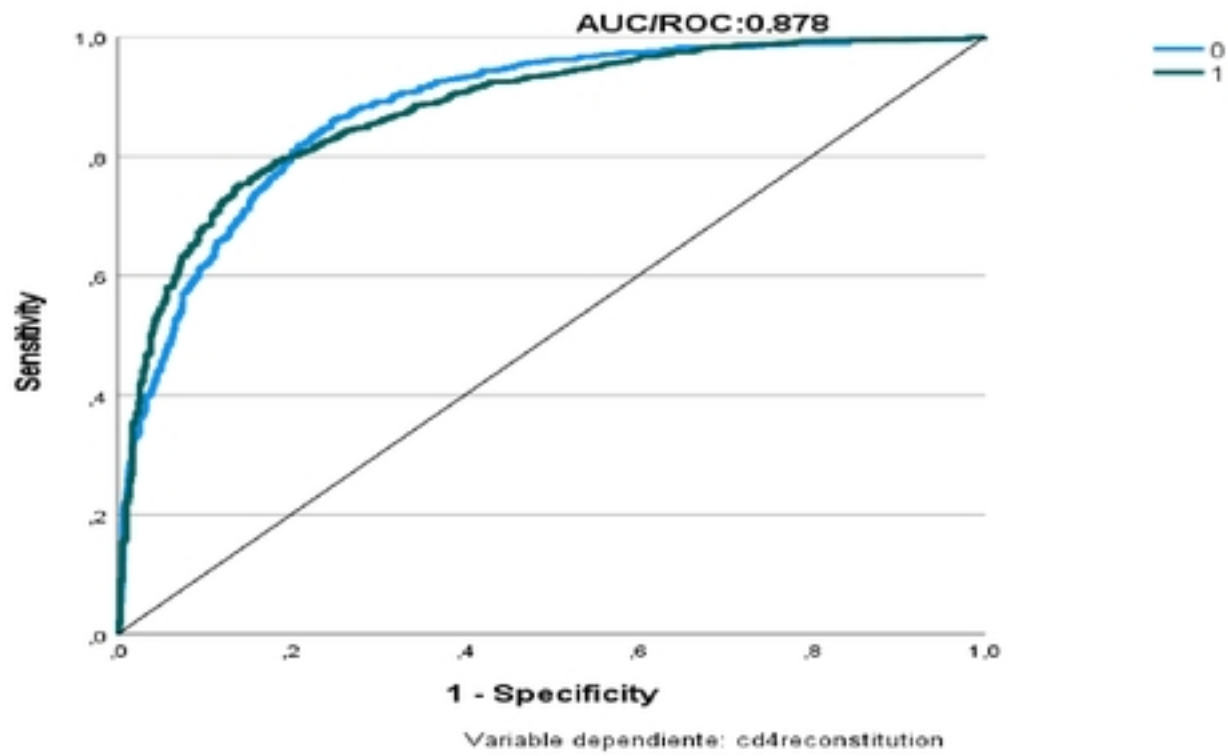

Source: https://medrxiv.org/content/10.1101/2024.10.26.24316181v1.full.pdf
